# Supplementary material for: A Patient-Derived Organoid-Based Radiosensitivity Model for the Prediction of Radiation Responses in Patients with Rectal Cancer
Source: MDPI journal article supplement (doi:10.3390/cancers13153760), 2021-07-27
Supplement: s1 [file s1]

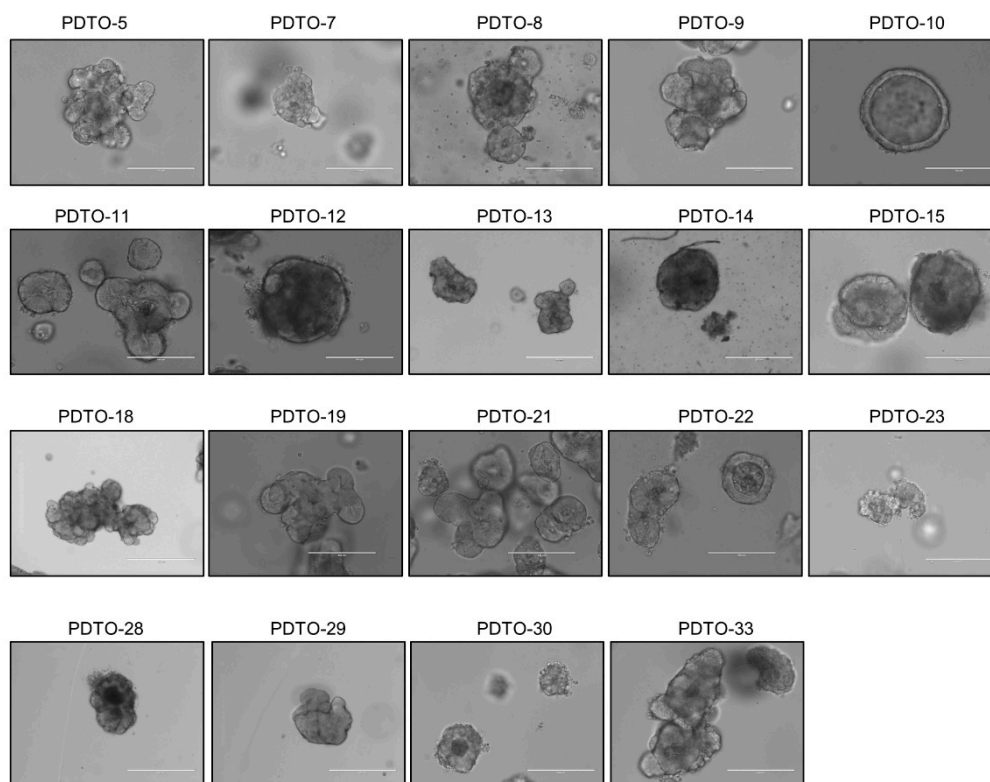

**Figure S1.** Observed morphologies of 19 PDOs. PDO, patient-derived tumour organoid.

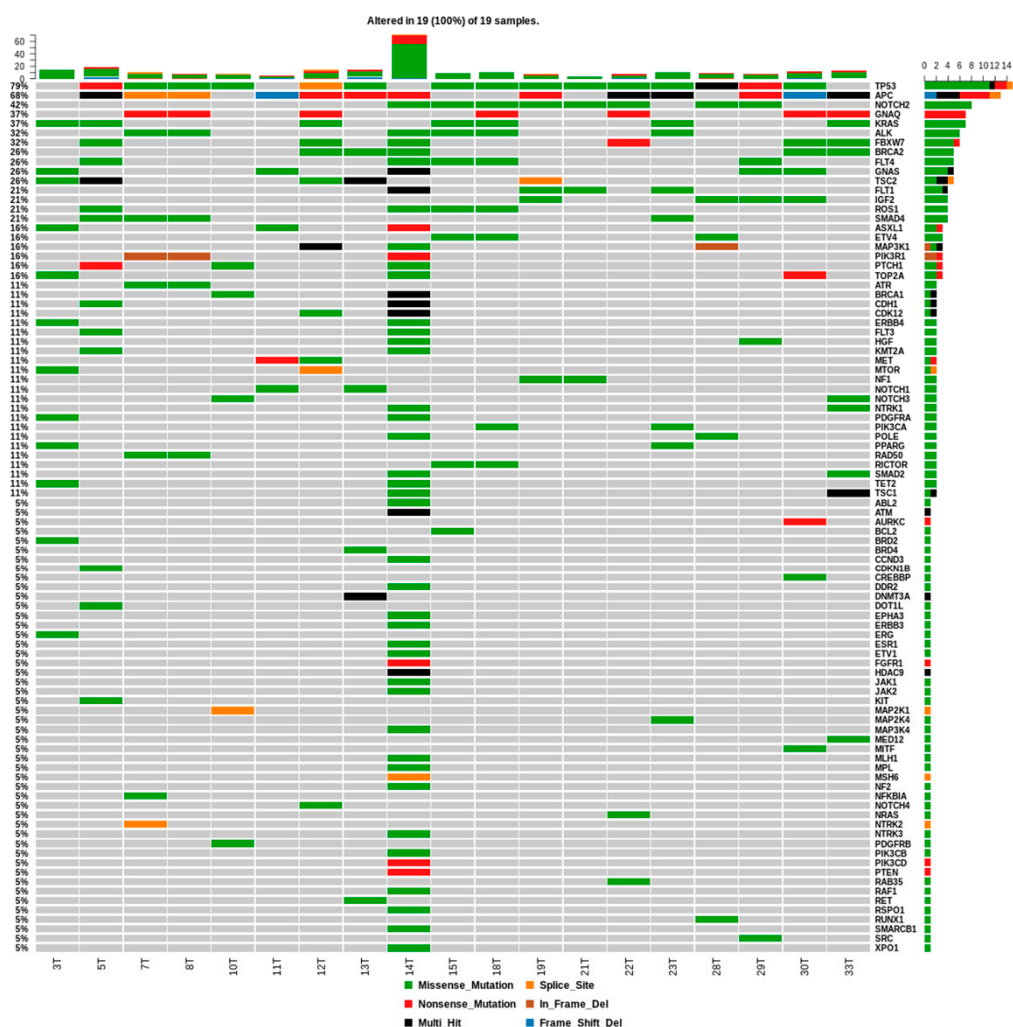

**Figure S2.** The mutation of 19 PDTs for all alterations is displayed. The frequency of alteration is noted along with the type of genetic alteration relative to frame-shift, in-frame, missense, nonsense, or splice-site alterations (as indicated by the colour code). PDT, patient-derived tumour organoid.

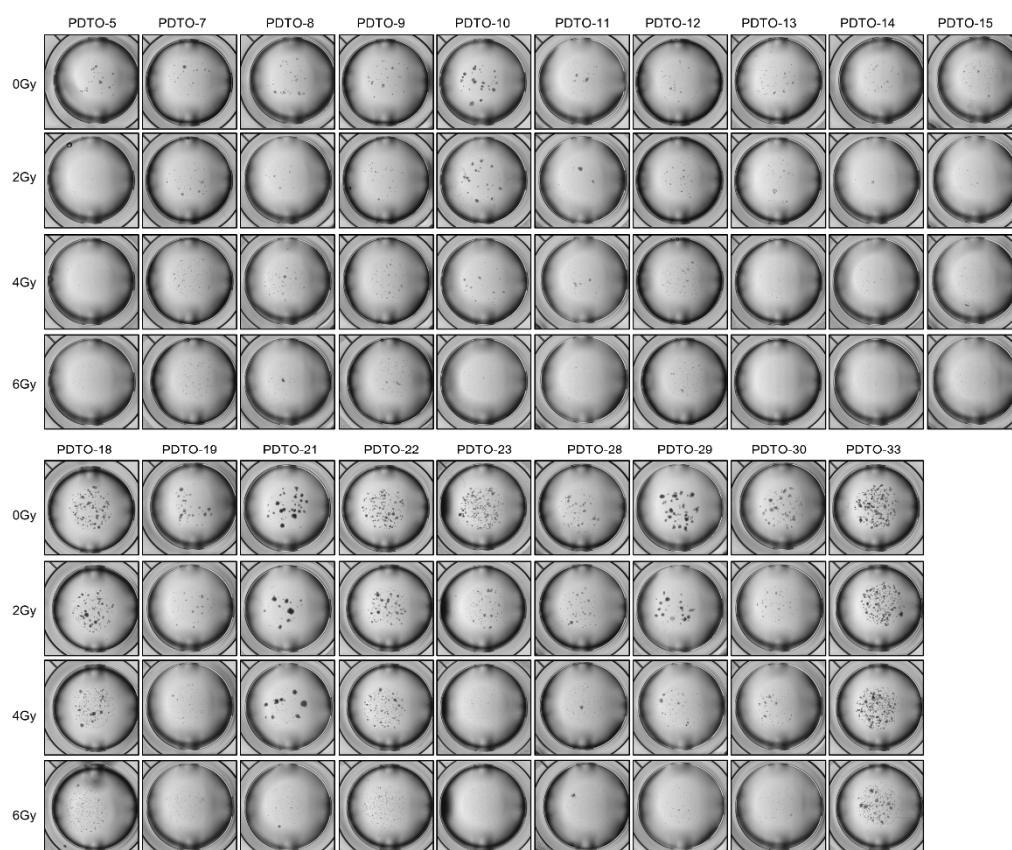

**Figure S3.** Morphologies of PDOs after irradiation at 2 Gy, 4 Gy, and 6 Gy. PDO, patient-derived tumour organoid.

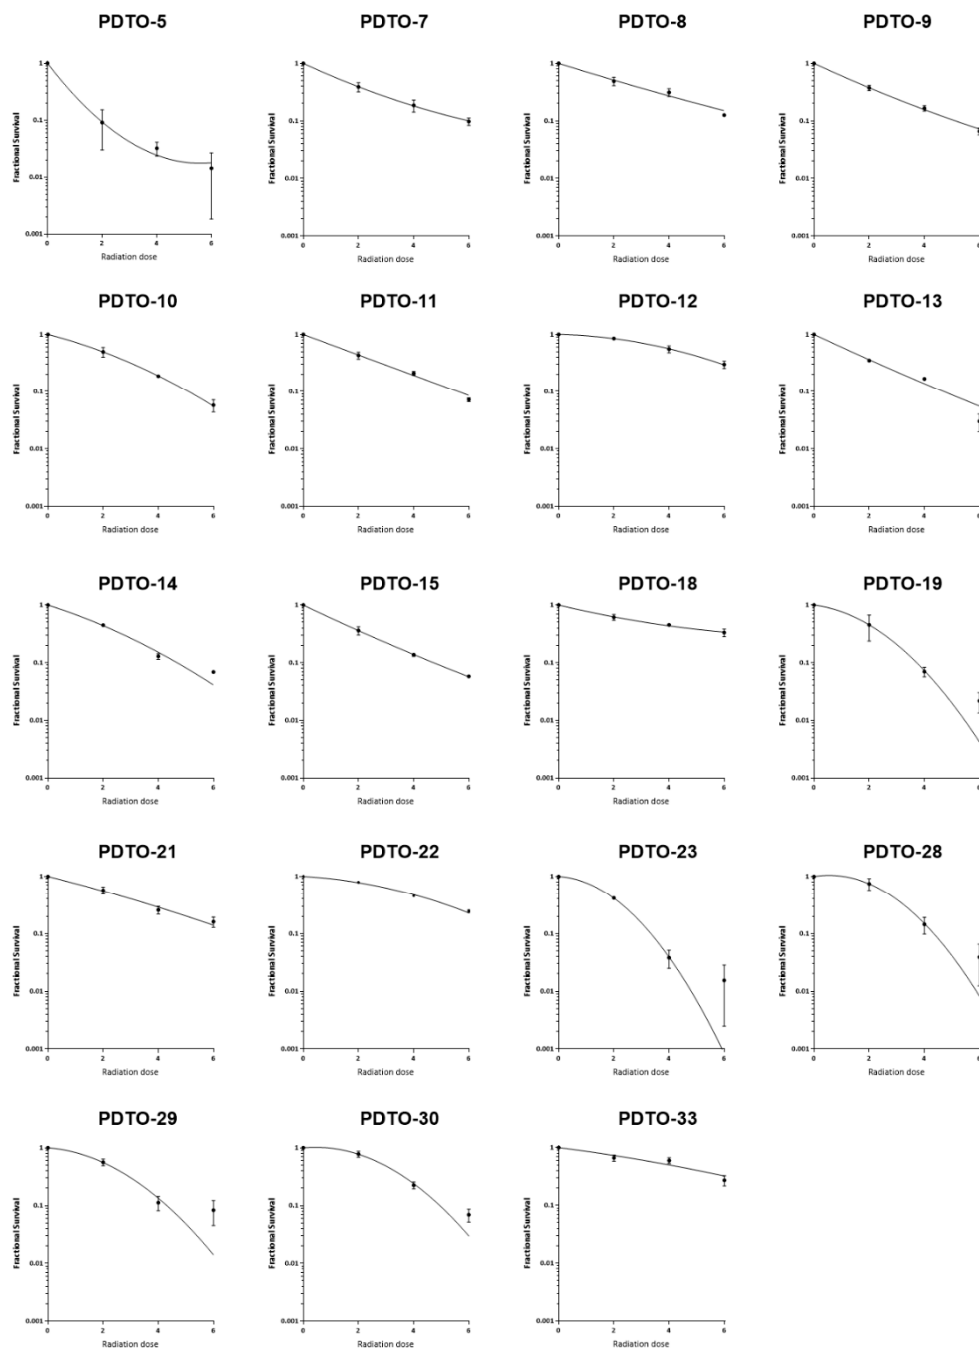

**Figure S4.** Dose-response of survival fraction in 19 PDTOs ( $n = 4$ , independent experiments for each PDTO) is shown at 0 Gy, 2 Gy, 4 Gy, and 6 Gy. Data are presented as mean  $\pm$  standard deviation. PDTO, patient-derived tumour organoid.

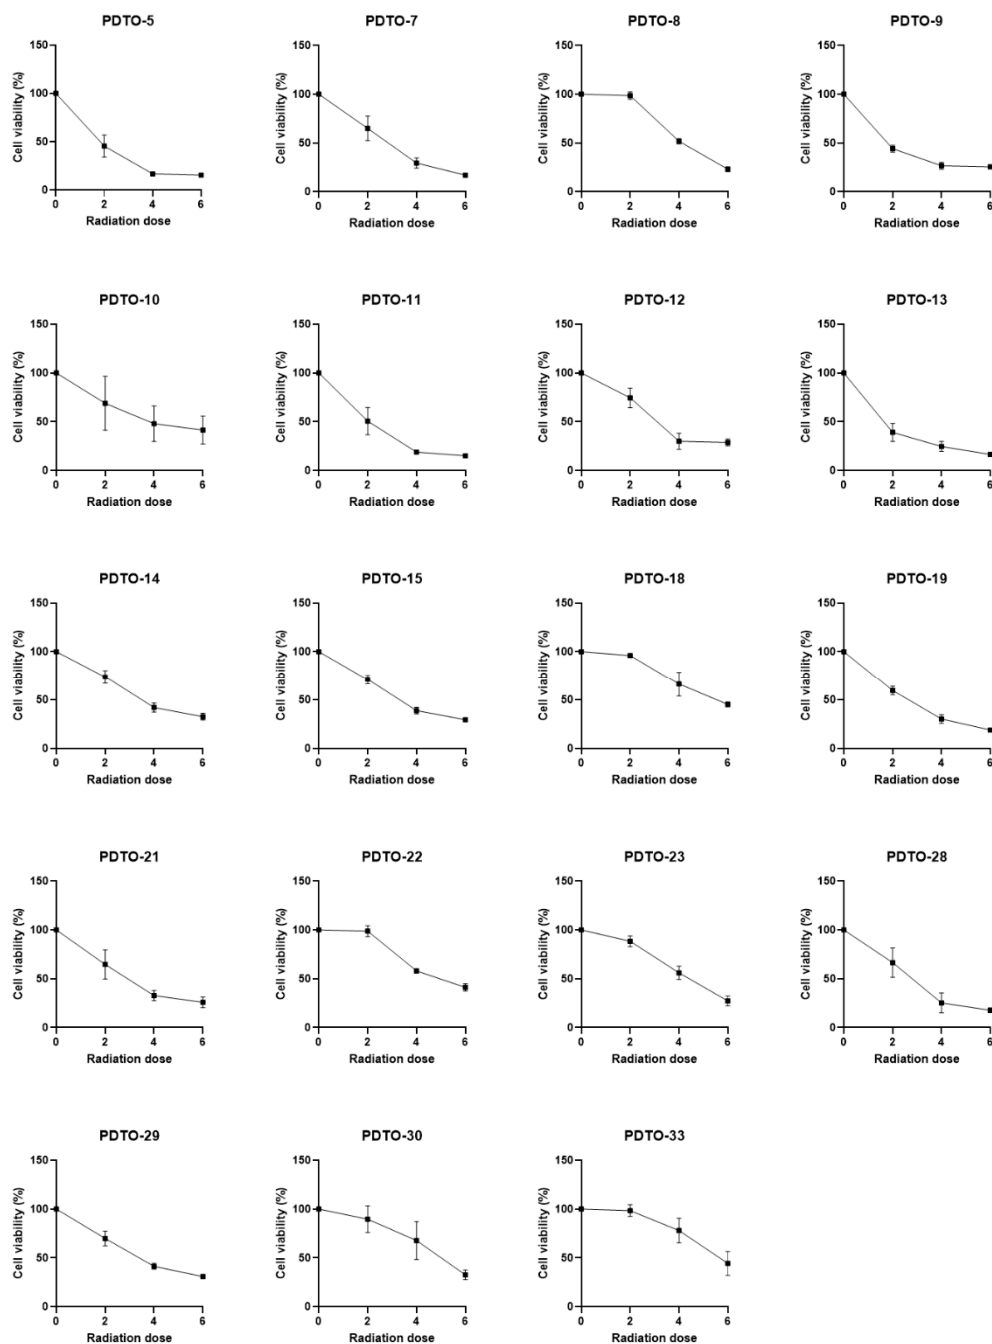

**Figure S5.** Dose-response of cell viability in 19 PDOs ( $n = 6$ , independent experiments for each PDO) is shown at 0 Gy, 2 Gy, 4 Gy, and 6 Gy. Data are presented as mean  $\pm$  standard deviation. PDO, patient-derived tumour organoid.

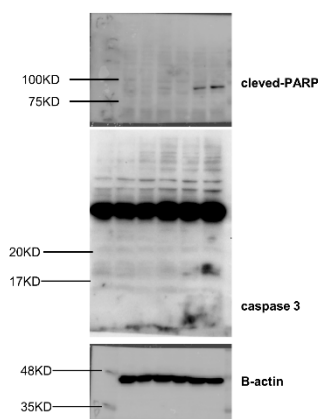

**Figure S6.** Whole blot showing all the bands with molecular weight marker.

**Table S1.** List of chemical and reagents used for studies.

| Chemical and Reagents         | Source                     | Catalog number | Final concentration. |
|-------------------------------|----------------------------|----------------|----------------------|
| Matrigel                      | Corning                    | 356231         |                      |
| Advanced DMEM/F12             | Gibco                      | 12634-010      |                      |
| HEPES                         | Gibco                      | 15630-080      | 1x                   |
| Gluta max                     | Gibco                      | 35050-06       | 1x                   |
| Penicillin-Streptomycin       | Gibco                      | 15140-122      | 1x                   |
| B27                           | Gibco                      | 17504-044      | 1x                   |
| N-acetyl cysteine             | United States Pharmacopeia | 1009005        | 1.25mM               |
| human epidermal growth factor | BioVision                  | 4022-100       | 50ng/ml              |
| human Noggin                  | Peprtech                   | 120-10c        | 50ng/ml              |
| gastrin                       | Sigma-Aldrich              | G9145          | 10nM                 |
| A83-01                        | BioVision                  | 1989-1         | 500nM                |
| primocin                      | InvivoGen                  | ant-pm-1       | 100ng/ml             |
| Y-27632                       | BioVision                  | 1784-5         | 10uM                 |

**Table S2.** List of antibodies used for studies.

| Antibodies                | Source                       | Catalog number | Antibody dilution |
|---------------------------|------------------------------|----------------|-------------------|
| anti-Ki-67                | Abcam                        | ab16667        | 1:200             |
| anti-Muc2                 | Abcam                        | ab90007        | 1:100             |
| anti-E-cadherin           | BD Transduction Laboratories | 610181         | 1:200             |
| anti-VL1                  | Santa Cruz Biotechnology     | SC-28283       | 1:100             |
| anti-ChgA                 | ImmunoStar                   | 20086          | 1:100             |
| anti-CDX2                 | Sigma-Aldrich                | 235R-16        | 1:200             |
| anti-CK20                 | Sigma-Aldrich                | 320M-16        | 1:500             |
| anti-CK19                 | Abcam                        | ab15463        | 1:400             |
| anti-cleaved PARP         | Cell Signaling Technology    | 5625           | 1:1000            |
| anti-caspase 3            | Cell Signaling Technology    | 9662           | 1:1000            |
| β-actin                   | Sigma-Aldrich                | A5441          | 1:4000            |
| goat anti-rabbit-Alexa594 | Thermo Fisher Scientific     | A11012         | 1:200             |
| goat anti-mouse-Alexa488  | Thermo Fisher Scientific     | A11001         | 1:200             |

**Table S3.** Results of ROC about two extreme categories. PPV; positive predictive value. NPV; negative predictive value.

|                     |                         | AUC (95% CI)        | Sensitivity | Specificity | PPV   | NPV    |
|---------------------|-------------------------|---------------------|-------------|-------------|-------|--------|
| <b>TRG 0 or not</b> | D0                      | 0.753 (0.644–0.863) | 78.3%       | 69.2%       | 52.9% | 87.8%  |
|                     | Survival fraction model | 0.897 (0.83–0.965)  | 95.0%       | 78.6%       | 61.3% | 97.8%  |
|                     | Cell viability model    | 0.631 (0.525–0.737) | 89.7%       | 39.3%       | 33.8% | 91.7%  |
| <b>TRG 3 or not</b> | D0                      | 0.966 (0.926–1)     | 100.0%      | 93.7%       | 75.0% | 100.0% |
|                     | Survival fraction model | 0.974 (0.941–1)     | 100.0%      | 93.8%       | 75.0% | 100.0% |
|                     | Cell viability model    | 0.898 (0.827–0.968) | 77.8%       | 92.6%       | 66.7% | 100.0% |
